# Supplementary material for: Visible-light-induced reduction of hexavalent chromium utilizing cobalt phosphate (Co-Pi) sensitized inverse opal TiO2as a photocatalyst
Source: Royal Society of Chemistry journal article supplement (doi:10.1039/c7cy01748k), 2017-01-01
Supplement: c7cy01748k1.pdf [file c7cy01748k1.pdf]

**Supporting Information for**

**Visible-Light-Induced Reduction of Hexavalent Chromium Utilizing**

**Cobalt Phosphate (Co-Pi) Sensitized Inverse Opal TiO<sub>2</sub> as A**

**Photocatalyst**

*Weijia Lv<sup>a</sup>, Zhihang Liu<sup>a</sup>, Jinjing Lan<sup>a</sup>, Ziyu Liu<sup>a</sup>, Wenxin Mi<sup>a</sup>, Juying Lei<sup>a,\*</sup>, Lingzhi Wang<sup>b</sup>,*

*Yongdi Liu<sup>a,\*</sup>, Jinlong Zhang<sup>b,c,\*</sup>*

<sup>a</sup>State Environmental Protection Key Laboratory of Environmental Risk Assessment and Control on Chemical Process, School of Resources and Environmental Engineering, East China University of Science and Technology, 130 Meilong Road, Shanghai 200237, P. R. China

<sup>b</sup> Key Lab for Advanced Materials and Institute of Fine Chemicals, East China University of Science and Technology, 130 Meilong Road, Shanghai 200237, P. R. China

<sup>c</sup>Suzhou Jukang New Materials Co. Ltd of Science and Technology, 558 Fenhua Road, Suzhou 201211, P. R. China

**\* Corresponding author:** Juying Lei; Yongdi Liu; Jinlong Zhang

**E-mail:** [leijuying@ecust.edu.cn](mailto:leijuying@ecust.edu.cn); [ydlou@ecust.edu.cn](mailto:ydlou@ecust.edu.cn); [jlzhang@ecust.edu.cn](mailto:jlzhang@ecust.edu.cn)

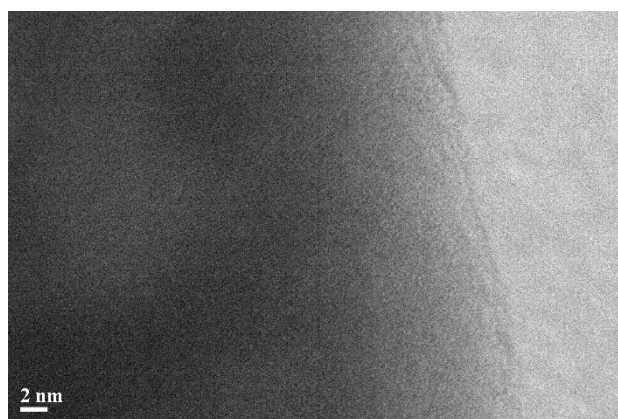

**Fig.S1** HRTEM image of pure Co-Pi.

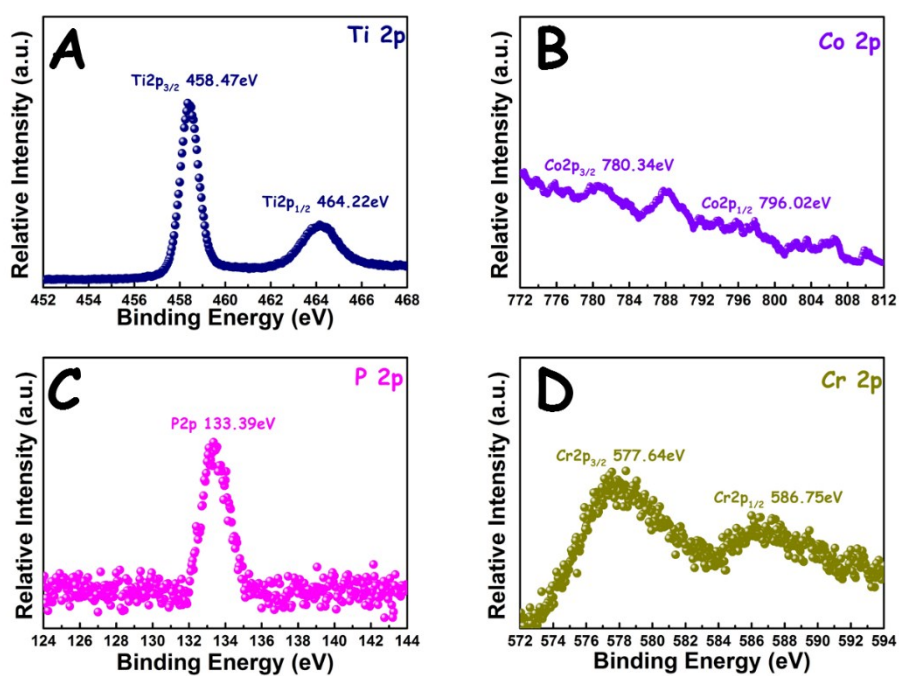

**Fig.S2** XPS spectra of Co-Pi/i.o.TiO<sub>2</sub> sample after photocatalytic reaction (A)Ti 2p (B) Co 2p (C) P 2p (D) Cr 2p..

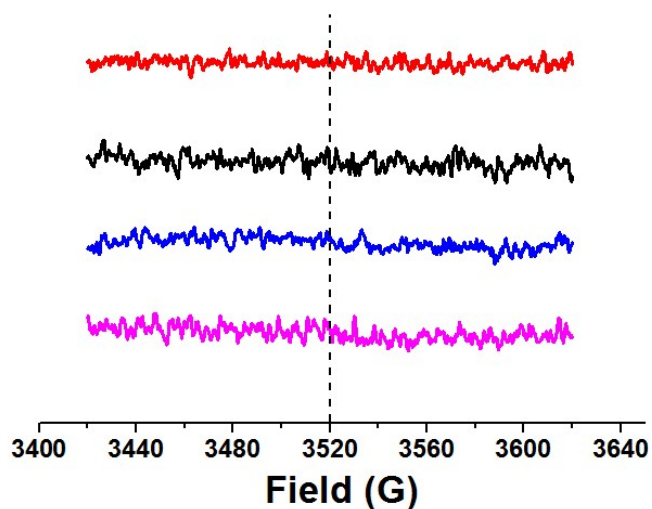

**Fig.S3** ESR spectra of the sample with irradiation time of 1min (red line) and 5min (black line), and the sample mixing with Methanol solution with irradiation time of 1min (blue line) and 5min (pink line).

The results demonstrate that no obvious signals of  $\bullet\text{OH}$  and  $\bullet\text{O}_2^-$  were detected, which indicates there are few  $\bullet\text{OH}$  and  $\bullet\text{O}_2^-$  involving in the reaction. Moreover, the comparison between the system of Co-Pi/i.o.TiO<sub>2</sub> +Cr(VI) +phenol and the system of Co-Pi/i.o.TiO<sub>2</sub> +phenol (as shown in Fig.10 in manuscript) can provide the evidence that there are also few  $\text{h}^+$  involving in the reaction.

---
